# Supplementary material
Source: publisher figshare collection journal article supplement (https://acs.figshare.com/ndownloader/files/5882535)
Supplement: Supplementary file 1 [file 5882535]

# om020621w.cif

--Message-Boundary-31923
Content-type: text/plain; charset=US-ASCII
Content-transfer-encoding: 7BIT
Content-description: Text from file 'OM020621W.cif'

  
data_hani001
;
 OM020621W
;
  
_audit_creation_method            SHELXL-97 
_chemical_name_systematic 
; 
 ? 
; 
_chemical_name_common             'compound 4'
_chemical_melting_point           ? 
_chemical_formula_moiety          ? 
_chemical_formula_sum 
 'C25 H44 Cl Ir O P2' 
_chemical_formula_weight          650.19 
  
loop_ 
 _atom_type_symbol 
 _atom_type_description 
 _atom_type_scat_dispersion_real 
 _atom_type_scat_dispersion_imag 
 _atom_type_scat_source 
 'C'  'C'   0.0033   0.0016 
 'International Tables Vol C Tables 4.2.6.8 and 6.1.1.4' 
 'H'  'H'   0.0000   0.0000 
 'International Tables Vol C Tables 4.2.6.8 and 6.1.1.4' 
 'O'  'O'   0.0106   0.0060 
 'International Tables Vol C Tables 4.2.6.8 and 6.1.1.4' 
 'P'  'P'   0.1023   0.0942 
 'International Tables Vol C Tables 4.2.6.8 and 6.1.1.4' 
 'Cl'  'Cl'   0.1484   0.1585 
 'International Tables Vol C Tables 4.2.6.8 and 6.1.1.4' 
 'Ir'  'Ir'  -1.4442   7.9887 
 'International Tables Vol C Tables 4.2.6.8 and 6.1.1.4' 
  
_symmetry_cell_setting            Monoclinic 
_symmetry_space_group_name_H-M    P2(1)/n 
  
loop_ 
 _symmetry_equiv_pos_as_xyz 
 'x, y, z' 
 '-x+1/2, y+1/2, -z+1/2' 
 '-x, -y, -z' 
 'x-1/2, -y-1/2, z-1/2' 
  
_cell_length_a                    8.344(2) 
_cell_length_b                    22.033(5) 
_cell_length_c                    15.031(3) 
_cell_angle_alpha                 90.00 
_cell_angle_beta                  104.04(2) 
_cell_angle_gamma                 90.00 
_cell_volume                      2680.8(11) 
_cell_formula_units_Z             4 
_cell_measurement_temperature     173(2) 
_cell_measurement_reflns_used     50 
_cell_measurement_theta_min       4.95 
_cell_measurement_theta_max       12.69 
  
_exptl_crystal_description        prism 
_exptl_crystal_colour             'dark red' 
_exptl_crystal_size_max           0.5
_exptl_crystal_size_mid           0.5 
_exptl_crystal_size_min           0.5 
_exptl_crystal_density_meas       ? 
_exptl_crystal_density_diffrn     1.611 
_exptl_crystal_density_method     'not measured' 
_exptl_crystal_F_000              1304 
_exptl_absorpt_coefficient_mu     5.214 
_exptl_absorpt_correction_type    empirical 
_exptl_absorpt_correction_T_min   0.3070 
_exptl_absorpt_correction_T_max   0.5254 
_exptl_absorpt_process_details    'psi-scan'
  
_exptl_special_details 
; 
 ? 
; 
  
_diffrn_ambient_temperature       173(2) 
_diffrn_radiation_wavelength      0.71073 
_diffrn_radiation_type            MoK\a 
_diffrn_radiation_source          'fine-focus sealed tube' 
_diffrn_radiation_monochromator   graphite 
_diffrn_measurement_device_type   'Bruker P4' 
_diffrn_measurement_method        '\w scans' 
_diffrn_detector_area_resol_mean  ? 
_diffrn_standards_number          2 
_diffrn_standards_interval_count  98 
_diffrn_standards_interval_time   ? 
_diffrn_standards_decay_%         ? 
_diffrn_reflns_number             7764 
_diffrn_reflns_av_R_equivalents   0.0273 
_diffrn_reflns_av_sigmaI/netI     0.0352 
_diffrn_reflns_limit_h_min        -1 
_diffrn_reflns_limit_h_max        10 
_diffrn_reflns_limit_k_min        -28 
_diffrn_reflns_limit_k_max        1 
_diffrn_reflns_limit_l_min        -19 
_diffrn_reflns_limit_l_max        19 
_diffrn_reflns_theta_min          2.32 
_diffrn_reflns_theta_max          27.50 
_reflns_number_total              6141 
_reflns_number_gt                 5559 
_reflns_threshold_expression      >2sigma(I) 
  
_computing_data_collection        'Bruker XSCANS' 
_computing_cell_refinement        'Bruker XSCANS' 
_computing_data_reduction         'Bruker SHELXTL' 
_computing_structure_solution     'SHELXS-97 (Sheldrick, 1990)' 
_computing_structure_refinement   'SHELXL-97 (Sheldrick, 1997)' 
_computing_molecular_graphics     'Bruker SHELXTL' 
_computing_publication_material   'Bruker SHELXTL' 
  
_refine_special_details 
; 
 Refinement of F^2^ against ALL reflections.  The weighted R-factor wR and 
 goodness of fit S are based on F^2^, conventional R-factors R are based 
 on F, with F set to zero for negative F^2^. The threshold expression of 
 F^2^ > 2sigma(F^2^) is used only for calculating R-factors(gt) etc. and is 
 not relevant to the choice of reflections for refinement.  R-factors based 
 on F^2^ are statistically about twice as large as those based on F, and R- 
 factors based on ALL data will be even larger. 
; 
  
_refine_ls_structure_factor_coef  Fsqd 
_refine_ls_matrix_type            full 
_refine_ls_weighting_scheme       calc 
_refine_ls_weighting_details 
 'calc w=1/[\s^2^(Fo^2^)+(0.0390P)^2^+6.3966P] where P=(Fo^2^+2Fc^2^)/3' 
_atom_sites_solution_primary      direct 
_atom_sites_solution_secondary    difmap 
_atom_sites_solution_hydrogens    geom 
_refine_ls_hydrogen_treatment     mixed 
_refine_ls_extinction_method      SHELXL 
_refine_ls_extinction_coef        0.00135(13) 
_refine_ls_extinction_expression 
 'Fc^*^=kFc[1+0.001xFc^2^\l^3^/sin(2\q)]^-1/4^' 
_refine_ls_number_reflns          6141 
_refine_ls_number_parameters      284 
_refine_ls_number_restraints      0 
_refine_ls_R_factor_all           0.0373 
_refine_ls_R_factor_gt            0.0328 
_refine_ls_wR_factor_ref          0.0827 
_refine_ls_wR_factor_gt           0.0805 
_refine_ls_goodness_of_fit_ref    1.087 
_refine_ls_restrained_S_all       1.087 
_refine_ls_shift/su_max           0.002 
_refine_ls_shift/su_mean          0.000 
  
loop_ 
 _atom_site_label 
 _atom_site_type_symbol 
 _atom_site_fract_x 
 _atom_site_fract_y 
 _atom_site_fract_z 
 _atom_site_U_iso_or_equiv 
 _atom_site_adp_type 
 _atom_site_occupancy 
 _atom_site_symmetry_multiplicity 
 _atom_site_calc_flag 
 _atom_site_refinement_flags 
 _atom_site_disorder_assembly 
 _atom_site_disorder_group 
Ir1 Ir 0.608662(18) 0.816952(6) 0.754528(10) 0.01876(7) Uani 1 1 d . . . 
Cl Cl 0.50561(17) 0.76391(5) 0.87389(9) 0.0373(3) Uani 1 1 d . . . 
P1 P 0.75730(13) 0.73602(5) 0.71644(8) 0.0219(2) Uani 1 1 d . . . 
P2 P 0.50306(12) 0.91003(5) 0.77133(7) 0.0188(2) Uani 1 1 d . . . 
O O 0.8453(4) 0.95237(16) 0.4437(2) 0.0344(7) Uani 1 1 d . . . 
C1 C 0.9203(6) 0.6918(2) 0.7995(4) 0.0322(10) Uani 1 1 d . . . 
C2 C 1.0469(7) 0.7384(3) 0.8491(5) 0.0533(16) Uani 1 1 d . . . 
H2A H 1.1314 0.7179 0.8962 0.080 Uiso 1 1 calc R . . 
H2B H 0.9913 0.7691 0.8779 0.080 Uiso 1 1 calc R . . 
H2C H 1.0993 0.7579 0.8048 0.080 Uiso 1 1 calc R . . 
C3 C 0.8486(7) 0.6600(3) 0.8719(4) 0.0509(15) Uani 1 1 d . . . 
H3A H 0.7796 0.6258 0.8437 0.076 Uiso 1 1 calc R . . 
H3B H 0.7814 0.6889 0.8969 0.076 Uiso 1 1 calc R . . 
H3C H 0.9390 0.6451 0.9215 0.076 Uiso 1 1 calc R . . 
C4 C 1.0048(8) 0.6447(3) 0.7518(4) 0.0520(15) Uani 1 1 d . . . 
H4A H 1.1007 0.6278 0.7959 0.078 Uiso 1 1 calc R . . 
H4B H 1.0412 0.6640 0.7013 0.078 Uiso 1 1 calc R . . 
H4C H 0.9268 0.6120 0.7275 0.078 Uiso 1 1 calc R . . 
C5 C 0.5918(6) 0.6868(2) 0.6430(3) 0.0307(10) Uani 1 1 d . . . 
C6 C 0.5203(7) 0.6429(2) 0.7007(4) 0.0425(12) Uani 1 1 d . . . 
H6A H 0.4182 0.6253 0.6634 0.064 Uiso 1 1 calc R . . 
H6B H 0.4962 0.6646 0.7529 0.064 Uiso 1 1 calc R . . 
H6C H 0.6003 0.6105 0.7233 0.064 Uiso 1 1 calc R . . 
C7 C 0.6473(7) 0.6524(3) 0.5667(4) 0.0441(13) Uani 1 1 d . . . 
H7A H 0.7479 0.6294 0.5934 0.066 Uiso 1 1 calc R . . 
H7B H 0.6696 0.6815 0.5219 0.066 Uiso 1 1 calc R . . 
H7C H 0.5597 0.6245 0.5362 0.066 Uiso 1 1 calc R . . 
C8 C 0.4531(6) 0.7323(3) 0.5994(4) 0.0415(12) Uani 1 1 d . . . 
H8A H 0.4911 0.7585 0.5561 0.062 Uiso 1 1 calc R . . 
H8B H 0.4257 0.7572 0.6477 0.062 Uiso 1 1 calc R . . 
H8C H 0.3547 0.7099 0.5670 0.062 Uiso 1 1 calc R . . 
C9 C 0.6952(5) 0.9273(2) 0.8618(3) 0.0305(10) Uani 1 1 d . . . 
C10 C 0.7821(5) 0.8668(2) 0.8472(3) 0.0278(9) Uani 1 1 d . . . 
H10A H 0.8185 0.8445 0.9058 0.033 Uiso 1 1 calc R . . 
H10B H 0.8798 0.8750 0.8226 0.033 Uiso 1 1 calc R . . 
C11 C 0.7904(7) 0.9825(3) 0.8426(5) 0.0529(16) Uani 1 1 d . . . 
H11A H 0.7262 1.0193 0.8462 0.079 Uiso 1 1 calc R . . 
H11B H 0.8101 0.9791 0.7811 0.079 Uiso 1 1 calc R . . 
H11C H 0.8965 0.9847 0.8881 0.079 Uiso 1 1 calc R . . 
C12 C 0.6724(7) 0.9299(3) 0.9587(4) 0.0507(15) Uani 1 1 d . . . 
H12A H 0.7794 0.9371 1.0017 0.076 Uiso 1 1 calc R . . 
H12B H 0.6268 0.8912 0.9736 0.076 Uiso 1 1 calc R . . 
H12C H 0.5962 0.9629 0.9635 0.076 Uiso 1 1 calc R . . 
C13 C 0.3018(5) 0.93391(19) 0.7936(3) 0.0234(8) Uani 1 1 d . . . 
C14 C 0.2739(6) 0.9042(2) 0.8809(3) 0.0372(11) Uani 1 1 d . . . 
H14A H 0.1591 0.9105 0.8840 0.056 Uiso 1 1 calc R . . 
H14B H 0.3483 0.9226 0.9347 0.056 Uiso 1 1 calc R . . 
H14C H 0.2965 0.8606 0.8798 0.056 Uiso 1 1 calc R . . 
C15 C 0.2936(6) 1.0036(2) 0.8006(4) 0.0348(10) Uani 1 1 d . . . 
H15A H 0.3099 1.0220 0.7441 0.052 Uiso 1 1 calc R . . 
H15B H 0.3803 1.0177 0.8528 0.052 Uiso 1 1 calc R . . 
H15C H 0.1853 1.0155 0.8094 0.052 Uiso 1 1 calc R . . 
C16 C 0.1675(5) 0.9108(3) 0.7124(3) 0.0359(11) Uani 1 1 d . . . 
H16A H 0.1807 0.8670 0.7054 0.054 Uiso 1 1 calc R . . 
H16B H 0.1772 0.9316 0.6563 0.054 Uiso 1 1 calc R . . 
H16C H 0.0586 0.9191 0.7234 0.054 Uiso 1 1 calc R . . 
C17 C 0.5162(5) 0.9526(2) 0.6684(3) 0.0275(9) Uani 1 1 d . . . 
H17A H 0.4057 0.9554 0.6256 0.033 Uiso 1 1 calc R . . 
H17B H 0.5569 0.9942 0.6854 0.033 Uiso 1 1 calc R . . 
C18 C 0.6353(5) 0.91899(19) 0.6231(3) 0.0239(8) Uani 1 1 d . . . 
C19 C 0.6847(5) 0.85961(18) 0.6513(3) 0.0207(8) Uani 1 1 d . . . 
C20 C 0.7959(5) 0.83187(18) 0.6062(3) 0.0219(8) Uani 1 1 d . . . 
C21 C 0.8670(6) 0.7701(2) 0.6367(3) 0.0319(10) Uani 1 1 d . . . 
H21A H 0.9858 0.7741 0.6672 0.038 Uiso 1 1 calc R . . 
H21B H 0.8566 0.7435 0.5826 0.038 Uiso 1 1 calc R . . 
C22 C 0.6917(5) 0.9490(2) 0.5549(3) 0.0254(8) Uani 1 1 d . . . 
H22 H 0.6575 0.9894 0.5386 0.030 Uiso 1 1 calc R . . 
C23 C 0.7979(5) 0.9196(2) 0.5108(3) 0.0239(8) Uani 1 1 d . . . 
C24 C 0.8481(5) 0.8609(2) 0.5352(3) 0.0258(9) Uani 1 1 d . . . 
H24 H 0.9179 0.8402 0.5039 0.031 Uiso 1 1 calc R . . 
C40 C 0.9806(6) 0.9292(2) 0.4127(4) 0.0379(11) Uani 1 1 d . . . 
H40A H 1.0741 0.9221 0.4654 0.057 Uiso 1 1 calc R . . 
H40B H 1.0127 0.9586 0.3712 0.057 Uiso 1 1 calc R . . 
H40C H 0.9487 0.8909 0.3800 0.057 Uiso 1 1 calc R . . 
  
loop_ 
 _atom_site_aniso_label 
 _atom_site_aniso_U_11 
 _atom_site_aniso_U_22 
 _atom_site_aniso_U_33 
 _atom_site_aniso_U_23 
 _atom_site_aniso_U_13 
 _atom_site_aniso_U_12 
Ir1 0.01909(9) 0.01607(9) 0.02350(10) 0.00082(5) 0.00978(6) -0.00084(6) 
Cl 0.0503(7) 0.0266(5) 0.0450(7) 0.0091(5) 0.0309(6) 0.0017(5) 
P1 0.0241(5) 0.0149(5) 0.0285(5) -0.0008(4) 0.0098(4) 0.0006(4) 
P2 0.0171(5) 0.0176(5) 0.0241(5) 0.0013(4) 0.0096(4) 0.0014(4) 
O 0.0344(17) 0.0419(19) 0.0341(17) 0.0111(15) 0.0224(14) 0.0064(15) 
C1 0.032(2) 0.023(2) 0.041(3) -0.0013(18) 0.007(2) 0.0060(18) 
C2 0.038(3) 0.040(3) 0.069(4) -0.006(3) -0.012(3) 0.004(2) 
C3 0.043(3) 0.059(4) 0.047(3) 0.025(3) 0.004(3) 0.009(3) 
C4 0.054(3) 0.040(3) 0.061(4) -0.010(3) 0.010(3) 0.019(3) 
C5 0.038(3) 0.025(2) 0.028(2) -0.0031(17) 0.0050(19) -0.0060(19) 
C6 0.049(3) 0.030(3) 0.049(3) -0.004(2) 0.013(2) -0.017(2) 
C7 0.051(3) 0.040(3) 0.038(3) -0.010(2) 0.006(2) 0.001(3) 
C8 0.035(3) 0.040(3) 0.044(3) -0.001(2) -0.001(2) -0.001(2) 
C9 0.020(2) 0.027(2) 0.042(3) -0.0057(19) 0.0039(18) 0.0010(17) 
C10 0.0165(18) 0.028(2) 0.038(2) -0.0033(18) 0.0055(17) 0.0026(17) 
C11 0.027(3) 0.030(3) 0.095(5) -0.008(3) 0.004(3) -0.004(2) 
C12 0.040(3) 0.067(4) 0.038(3) -0.022(3) -0.002(2) 0.018(3) 
C13 0.0180(18) 0.026(2) 0.029(2) 0.0020(16) 0.0117(16) 0.0020(16) 
C14 0.035(3) 0.044(3) 0.040(3) 0.010(2) 0.023(2) 0.004(2) 
C15 0.037(3) 0.030(2) 0.043(3) 0.002(2) 0.021(2) 0.009(2) 
C16 0.019(2) 0.047(3) 0.041(3) -0.003(2) 0.0053(18) -0.005(2) 
C17 0.027(2) 0.027(2) 0.033(2) 0.0078(18) 0.0172(18) 0.0073(18) 
C18 0.024(2) 0.024(2) 0.028(2) -0.0003(16) 0.0124(16) -0.0006(16) 
C19 0.0207(18) 0.0194(18) 0.0247(19) -0.0006(15) 0.0107(15) -0.0003(15) 
C20 0.0224(19) 0.0175(18) 0.028(2) -0.0014(15) 0.0101(16) -0.0017(15) 
C21 0.037(2) 0.022(2) 0.044(3) 0.0001(19) 0.024(2) 0.0040(19) 
C22 0.024(2) 0.024(2) 0.030(2) 0.0067(17) 0.0111(16) 0.0014(17) 
C23 0.0219(19) 0.030(2) 0.0219(19) 0.0037(16) 0.0097(15) -0.0028(16) 
C24 0.026(2) 0.029(2) 0.027(2) -0.0044(17) 0.0158(17) -0.0041(17) 
C40 0.038(3) 0.047(3) 0.038(3) 0.010(2) 0.027(2) 0.008(2) 
  
_geom_special_details 
; 
 All esds (except the esd in the dihedral angle between two l.s. planes) 
 are estimated using the full covariance matrix.  The cell esds are taken 
 into account individually in the estimation of esds in distances, angles 
 and torsion angles; correlations between esds in cell parameters are only 
 used when they are defined by crystal symmetry.  An approximate (isotropic) 
 treatment of cell esds is used for estimating esds involving l.s. planes.

 Least-squares planes (x,y,z in crystal coordinates) and deviations from them
 (* indicates atom used to define plane)

  5.1684 (0.0092) x + 7.6697 (0.0298) y + 8.0012 (0.0159) z =
     15.3819 (0.0212)

 *    0.0668 (0.0016)  Ir1
 *   -0.0391 (0.0024)  C19
 *   -0.0374 (0.0031)  C20
 *    0.1001 (0.0028)  C21
 *   -0.0904 (0.0020)  P1

 Rms deviation of fitted atoms =   0.0715


  5.9413 (0.0085) x + 7.7618 (0.0280) y + 6.2592 (0.0175) z =
     14.7657 (0.0240)

 Angle to previous plane (with approximate esd) =  7.66 ( 0.22 )

 *   -0.0857 (0.0016)  Ir1
 *    0.0508 (0.0024)  C19
 *    0.0416 (0.0030)  C18
 *   -0.1212 (0.0026)  C17
 *    0.1145 (0.0019)  P2

 Rms deviation of fitted atoms =   0.0888


  4.7879 (0.0124) x + 8.4058 (0.0295) y - 12.6605 (0.0145) z =
     0.2597 (0.0336)

 Angle to previous plane (with approximate esd) = 84.10 ( 0.10 )

 *   -0.0311 (0.0016)  Ir1
 *    0.0330 (0.0017)  P2
 *   -0.0473 (0.0024)  C9
 *    0.0454 (0.0023)  C10

 Rms deviation of fitted atoms =   0.0399


  5.7192 (0.0046) x + 6.0517 (0.0111) y + 7.3331 (0.0113) z =
     13.9740 (0.0073)

 Angle to previous plane (with approximate esd) = 89.46 ( 0.08 )

 *   -0.0512 (0.0011)  Cl
 *    0.0665 (0.0012)  P2
 *   -0.0802 (0.0016)  C19
 *    0.0650 (0.0013)  P1
     -0.0161 (0.0011)  Ir1

 Rms deviation of fitted atoms =   0.0665


  5.7189 (0.0046) x + 6.0515 (0.0111) y + 7.3337 (0.0113) z =
     13.9710 (0.0073)

 Angle to previous plane (with approximate esd) =  0.00 ( 0.13 )

 *   -0.0478 (0.0013)  Cl
 *    0.0697 (0.0011)  P2
 *   -0.0771 (0.0017)  C19
 *    0.0681 (0.0011)  P1
 *   -0.0129 (0.0009)  Ir1

 Rms deviation of fitted atoms =   0.0598


  5.4965 (0.0048) x + 7.8121 (0.0150) y + 7.2734 (0.0086) z =
     15.2631 (0.0124)

 Angle to previous plane (with approximate esd) =  4.87 ( 0.12 )

 *   -0.0475 (0.0013)  Ir1
 *   -0.0474 (0.0038)  C19
 *    0.0198 (0.0039)  C20
 *    0.1496 (0.0040)  C21
 *   -0.1398 (0.0022)  P1
 *   -0.0602 (0.0039)  C18
 *   -0.1223 (0.0036)  C17
 *    0.2214 (0.0020)  P2
 *   -0.0118 (0.0037)  C22
 *    0.0218 (0.0034)  C23
 *    0.0165 (0.0037)  C24

 Rms deviation of fitted atoms =   0.1024
; 
  
loop_ 
 _geom_bond_atom_site_label_1 
 _geom_bond_atom_site_label_2 
 _geom_bond_distance 
 _geom_bond_site_symmetry_2 
 _geom_bond_publ_flag 
Ir1 C19 2.042(4) . ? 
Ir1 C10 2.064(4) . ? 
Ir1 P2 2.2702(11) . ? 
Ir1 P1 2.3217(11) . ? 
Ir1 Cl 2.4643(11) . ? 
P1 C21 1.836(5) . ? 
P1 C1 1.880(5) . ? 
P1 C5 1.888(5) . ? 
P2 C17 1.834(4) . ? 
P2 C13 1.866(4) . ? 
P2 C9 1.872(5) . ? 
O C23 1.374(5) . ? 
O C40 1.417(5) . ? 
C1 C4 1.529(7) . ? 
C1 C2 1.530(7) . ? 
C1 C3 1.533(8) . ? 
C5 C6 1.515(7) . ? 
C5 C7 1.537(7) . ? 
C5 C8 1.552(7) . ? 
C9 C12 1.515(7) . ? 
C9 C11 1.518(7) . ? 
C9 C10 1.559(6) . ? 
C13 C16 1.530(6) . ? 
C13 C14 1.534(6) . ? 
C13 C15 1.542(6) . ? 
C17 C18 1.526(6) . ? 
C18 C22 1.394(6) . ? 
C18 C19 1.406(6) . ? 
C19 C20 1.414(5) . ? 
C20 C24 1.401(6) . ? 
C20 C21 1.510(6) . ? 
C22 C23 1.388(6) . ? 
C23 C24 1.382(6) . ? 
  
loop_ 
 _geom_angle_atom_site_label_1 
 _geom_angle_atom_site_label_2 
 _geom_angle_atom_site_label_3 
 _geom_angle 
 _geom_angle_site_symmetry_1 
 _geom_angle_site_symmetry_3 
 _geom_angle_publ_flag 
C19 Ir1 C10 88.37(18) . . ? 
C19 Ir1 P2 82.49(11) . . ? 
C10 Ir1 P2 70.85(12) . . ? 
C19 Ir1 P1 83.29(11) . . ? 
C10 Ir1 P1 104.23(12) . . ? 
P2 Ir1 P1 165.06(4) . . ? 
C19 Ir1 Cl 177.38(12) . . ? 
C10 Ir1 Cl 94.16(14) . . ? 
P2 Ir1 Cl 97.70(4) . . ? 
P1 Ir1 Cl 96.72(4) . . ? 
C21 P1 C1 104.5(2) . . ? 
C21 P1 C5 105.3(2) . . ? 
C1 P1 C5 113.5(2) . . ? 
C21 P1 Ir1 103.14(14) . . ? 
C1 P1 Ir1 125.29(16) . . ? 
C5 P1 Ir1 103.12(16) . . ? 
C17 P2 C13 104.31(19) . . ? 
C17 P2 C9 107.0(2) . . ? 
C13 P2 C9 117.5(2) . . ? 
C17 P2 Ir1 105.30(14) . . ? 
C13 P2 Ir1 131.70(14) . . ? 
C9 P2 Ir1 88.71(15) . . ? 
C23 O C40 116.5(4) . . ? 
C4 C1 C2 110.0(5) . . ? 
C4 C1 C3 109.1(5) . . ? 
C2 C1 C3 107.7(5) . . ? 
C4 C1 P1 112.5(4) . . ? 
C2 C1 P1 106.2(3) . . ? 
C3 C1 P1 111.4(4) . . ? 
C6 C5 C7 110.2(4) . . ? 
C6 C5 C8 107.3(5) . . ? 
C7 C5 C8 109.4(4) . . ? 
C6 C5 P1 111.5(3) . . ? 
C7 C5 P1 114.2(4) . . ? 
C8 C5 P1 103.9(3) . . ? 
C12 C9 C11 110.3(5) . . ? 
C12 C9 C10 109.8(4) . . ? 
C11 C9 C10 112.0(4) . . ? 
C12 C9 P2 114.9(4) . . ? 
C11 C9 P2 114.9(4) . . ? 
C10 C9 P2 94.0(3) . . ? 
C9 C10 Ir1 106.0(3) . . ? 
C16 C13 C14 107.9(4) . . ? 
C16 C13 C15 110.5(4) . . ? 
C14 C13 C15 110.3(4) . . ? 
C16 C13 P2 106.3(3) . . ? 
C14 C13 P2 111.3(3) . . ? 
C15 C13 P2 110.5(3) . . ? 
C18 C17 P2 107.9(3) . . ? 
C22 C18 C19 122.4(4) . . ? 
C22 C18 C17 118.1(4) . . ? 
C19 C18 C17 119.5(4) . . ? 
C18 C19 C20 115.9(4) . . ? 
C18 C19 Ir1 122.3(3) . . ? 
C20 C19 Ir1 121.7(3) . . ? 
C24 C20 C19 122.0(4) . . ? 
C24 C20 C21 118.1(4) . . ? 
C19 C20 C21 120.0(4) . . ? 
C20 C21 P1 110.2(3) . . ? 
C23 C22 C18 119.9(4) . . ? 
O C23 C24 124.3(4) . . ? 
O C23 C22 115.9(4) . . ? 
C24 C23 C22 119.8(4) . . ? 
C23 C24 C20 120.0(4) . . ? 
  
loop_ 
 _geom_torsion_atom_site_label_1 
 _geom_torsion_atom_site_label_2 
 _geom_torsion_atom_site_label_3 
 _geom_torsion_atom_site_label_4 
 _geom_torsion 
 _geom_torsion_site_symmetry_1 
 _geom_torsion_site_symmetry_2 
 _geom_torsion_site_symmetry_3 
 _geom_torsion_site_symmetry_4 
 _geom_torsion_publ_flag 
C19 Ir1 P1 C21 9.6(2) . . . . ? 
C10 Ir1 P1 C21 -77.0(2) . . . . ? 
P2 Ir1 P1 C21 -8.2(2) . . . . ? 
Cl Ir1 P1 C21 -173.05(18) . . . . ? 
C19 Ir1 P1 C1 128.3(2) . . . . ? 
C10 Ir1 P1 C1 41.7(2) . . . . ? 
P2 Ir1 P1 C1 110.5(2) . . . . ? 
Cl Ir1 P1 C1 -54.3(2) . . . . ? 
C19 Ir1 P1 C5 -99.83(19) . . . . ? 
C10 Ir1 P1 C5 173.6(2) . . . . ? 
P2 Ir1 P1 C5 -117.7(2) . . . . ? 
Cl Ir1 P1 C5 77.54(16) . . . . ? 
C19 Ir1 P2 C17 12.3(2) . . . . ? 
C10 Ir1 P2 C17 103.2(2) . . . . ? 
P1 Ir1 P2 C17 30.2(2) . . . . ? 
Cl Ir1 P2 C17 -165.07(17) . . . . ? 
C19 Ir1 P2 C13 138.2(2) . . . . ? 
C10 Ir1 P2 C13 -130.9(2) . . . . ? 
P1 Ir1 P2 C13 156.1(2) . . . . ? 
Cl Ir1 P2 C13 -39.12(19) . . . . ? 
C19 Ir1 P2 C9 -95.0(2) . . . . ? 
C10 Ir1 P2 C9 -4.1(2) . . . . ? 
P1 Ir1 P2 C9 -77.1(2) . . . . ? 
Cl Ir1 P2 C9 87.64(16) . . . . ? 
C21 P1 C1 C4 -57.3(4) . . . . ? 
C5 P1 C1 C4 56.9(5) . . . . ? 
Ir1 P1 C1 C4 -175.4(3) . . . . ? 
C21 P1 C1 C2 63.0(4) . . . . ? 
C5 P1 C1 C2 177.2(4) . . . . ? 
Ir1 P1 C1 C2 -55.1(4) . . . . ? 
C21 P1 C1 C3 180.0(4) . . . . ? 
C5 P1 C1 C3 -65.8(4) . . . . ? 
Ir1 P1 C1 C3 61.9(4) . . . . ? 
C21 P1 C5 C6 164.9(4) . . . . ? 
C1 P1 C5 C6 51.1(4) . . . . ? 
Ir1 P1 C5 C6 -87.3(4) . . . . ? 
C21 P1 C5 C7 39.2(4) . . . . ? 
C1 P1 C5 C7 -74.5(4) . . . . ? 
Ir1 P1 C5 C7 147.0(3) . . . . ? 
C21 P1 C5 C8 -79.9(4) . . . . ? 
C1 P1 C5 C8 166.4(3) . . . . ? 
Ir1 P1 C5 C8 27.9(3) . . . . ? 
C17 P2 C9 C12 145.6(4) . . . . ? 
C13 P2 C9 C12 28.8(5) . . . . ? 
Ir1 P2 C9 C12 -108.8(4) . . . . ? 
C17 P2 C9 C11 16.1(4) . . . . ? 
C13 P2 C9 C11 -100.7(4) . . . . ? 
Ir1 P2 C9 C11 121.7(4) . . . . ? 
C17 P2 C9 C10 -100.5(3) . . . . ? 
C13 P2 C9 C10 142.8(3) . . . . ? 
Ir1 P2 C9 C10 5.2(3) . . . . ? 
C12 C9 C10 Ir1 112.4(4) . . . . ? 
C11 C9 C10 Ir1 -124.8(4) . . . . ? 
P2 C9 C10 Ir1 -5.9(3) . . . . ? 
C19 Ir1 C10 C9 87.8(3) . . . . ? 
P2 Ir1 C10 C9 5.1(3) . . . . ? 
P1 Ir1 C10 C9 170.4(3) . . . . ? 
Cl Ir1 C10 C9 -91.6(3) . . . . ? 
C17 P2 C13 C16 65.2(4) . . . . ? 
C9 P2 C13 C16 -176.5(3) . . . . ? 
Ir1 P2 C13 C16 -61.1(4) . . . . ? 
C17 P2 C13 C14 -177.6(3) . . . . ? 
C9 P2 C13 C14 -59.3(4) . . . . ? 
Ir1 P2 C13 C14 56.1(4) . . . . ? 
C17 P2 C13 C15 -54.6(4) . . . . ? 
C9 P2 C13 C15 63.6(4) . . . . ? 
Ir1 P2 C13 C15 179.0(2) . . . . ? 
C13 P2 C17 C18 -157.6(3) . . . . ? 
C9 P2 C17 C18 77.2(3) . . . . ? 
Ir1 P2 C17 C18 -16.2(3) . . . . ? 
P2 C17 C18 C22 -166.9(3) . . . . ? 
P2 C17 C18 C19 12.9(5) . . . . ? 
C22 C18 C19 C20 0.1(6) . . . . ? 
C17 C18 C19 C20 -179.6(4) . . . . ? 
C22 C18 C19 Ir1 177.6(3) . . . . ? 
C17 C18 C19 Ir1 -2.0(6) . . . . ? 
C10 Ir1 C19 C18 -78.4(4) . . . . ? 
P2 Ir1 C19 C18 -7.5(3) . . . . ? 
P1 Ir1 C19 C18 177.1(4) . . . . ? 
Cl Ir1 C19 C18 87(3) . . . . ? 
C10 Ir1 C19 C20 99.0(4) . . . . ? 
P2 Ir1 C19 C20 169.9(3) . . . . ? 
P1 Ir1 C19 C20 -5.5(3) . . . . ? 
Cl Ir1 C19 C20 -96(3) . . . . ? 
C18 C19 C20 C24 -2.6(6) . . . . ? 
Ir1 C19 C20 C24 179.8(3) . . . . ? 
C18 C19 C20 C21 175.1(4) . . . . ? 
Ir1 C19 C20 C21 -2.4(6) . . . . ? 
C24 C20 C21 P1 -170.9(3) . . . . ? 
C19 C20 C21 P1 11.3(5) . . . . ? 
C1 P1 C21 C20 -145.5(3) . . . . ? 
C5 P1 C21 C20 94.6(4) . . . . ? 
Ir1 P1 C21 C20 -13.2(4) . . . . ? 
C19 C18 C22 C23 1.4(7) . . . . ? 
C17 C18 C22 C23 -178.9(4) . . . . ? 
C40 O C23 C24 -14.3(6) . . . . ? 
C40 O C23 C22 166.1(4) . . . . ? 
C18 C22 C23 O 179.1(4) . . . . ? 
C18 C22 C23 C24 -0.4(7) . . . . ? 
O C23 C24 C20 178.4(4) . . . . ? 
C22 C23 C24 C20 -2.0(6) . . . . ? 
C19 C20 C24 C23 3.6(7) . . . . ? 
C21 C20 C24 C23 -174.2(4) . . . . ? 
  
_diffrn_measured_fraction_theta_max    0.997 
_diffrn_reflns_theta_full              27.50 
_diffrn_measured_fraction_theta_full   0.997 
_refine_diff_density_max    2.361 
_refine_diff_density_min   -1.685 
_refine_diff_density_rms    0.135 
  
#===END
